# Supplementary material
Source: PubMed Central journal article supplement (PMC7808269)
Supplement: NIHMS1647910-supplement-Supplementary_Tables.pdf [file NIHMS1647910-supplement-Supplementary_Tables.pdf]

**Supplementary Table 1: Top downregulated (positive NES values) and upregulated (negative NES values) pathways in bone marrow-derived *Rel<sup>f/-</sup>* MDSCs as determined by GSEA of the RNA-seq data.**

| <b>Top enriched gene signatures in WT vs <i>Rel<sup>f/-</sup></i> MDSCs</b> | <b>NES</b> | <b>NOM p-val</b> | <b>FDR q-val</b> |
|-----------------------------------------------------------------------------|------------|------------------|------------------|
| CELLULAR_CARBOHYDRATE_BIOSYNTHETIC_PROCESS                                  | 1.88       | 0.002            | 0.158            |
| REGULATION_OF_GLUCOSE_METABOLIC_PROCESS                                     | 1.84       | 0                | 0.139            |
| CELLULAR_CARBOHYDRATE_METABOLIC_PROCESS                                     | 1.81       | 0                | 0.169            |
| LIPID_OXIDATION                                                             | 1.81       | 0                | 0.163            |
| NEUTRAL_LIPID_BIOSYNTHETIC_PROCESS                                          | 1.78       | 0.006            | 0.198            |
| LONG_CHAIN_FATTY_ACID_TRANSPORT                                             | 1.76       | 0.006            | 0.175            |
| FATTY_ACID_CATABOLIC_PROCESS                                                | 1.71       | 0                | 0.268            |
| GLUTAMINE_FAMILY_AMINO_ACID_CATABOLIC_PROCESS                               | 1.69       | 0.013            | 0.286            |
| REGULATION_OF_CARBOHYDRATE_BIOSYNTHETIC_PROCESS                             | 1.68       | 0.002            | 0.287            |
| G2M_CHECKPOINT                                                              | -2.62      | 0                | 0                |
| E2F_TARGETS                                                                 | -2.56      | 0                | 0                |
| MITOTIC_SPINDLE                                                             | -2.16      | 0                | 0                |
| TNFA_SIGNALING_VIA_NFKB                                                     | -2.07      | 0                | 2.86E-04         |
| INTERFERON_GAMMA_RESPONSE                                                   | -1.99      | 0                | 2.29E-04         |
| INFLAMMATORY_RESPONSE                                                       | -1.99      | 0                | 1.90E-04         |
| ALLOGRAFT_REJECTION                                                         | -1.95      | 0                | 1.63E-04         |
| IL6_JAK_STAT3_SIGNALING                                                     | -1.80      | 0                | 0.002            |
| INTERFERON_ALPHA_RESPONSE                                                   | -1.68      | 0                | 0.008            |
| SPERMATOGENESIS                                                             | -1.57      | 0.011            | 0.026            |

NES, normalized enrichment score; NOM p value, normalized p value; FDR, false discovery rate. Statistical significance was determined by Wald test with Benjamini-Hochberg's multiple-comparison correction.

**Supplementary Table 2: Top upregulated pathways in bone marrow- derived Rel-/- MDSCs as determined by Ingenuity Pathway Analysis of the RNA-seq data.**

| <b>Diseases or Functions Annotation</b> | <b>p-Value</b> | <b>Predicted Activation State</b> | <b>Activation z-score</b> |
|-----------------------------------------|----------------|-----------------------------------|---------------------------|
| Leukocyte migration                     | 1.85E-25       | Increased                         | 4.111                     |
| Quantity of cells                       | 2.06E-24       | Increased                         | 3.309                     |
| Cell movement of leukocytes             | 1.01E-22       | Increased                         | 3.571                     |
| Chemotaxis of leukocytes                | 1.58E-22       | Increased                         | 3.195                     |
| Quantity of leukocytes                  | 1.86E-22       | Increased                         | 3.795                     |
| Cell movement of phagocytes             | 4.29E-22       | Increased                         | 3.785                     |
| Quantity of blood cells                 | 4.88E-22       | Increased                         | 3.893                     |
| Proliferation of blood cells            | 7.28E-21       |                                   | 1.744                     |
| Inflammatory response                   | 9.79E-21       | Increased                         | 2.774                     |

Statistical significance was determined by right-tailed Fisher's Exact Test.
